1 **Mitochondrial metabolism in *Drosophila* macrophage-like cells**  
2 **regulates body growth via modulation of cytokine and insulin**  
3 **signaling.**

4

5 Shrivani Sriskanthadevan-Pirahas, Abdul Qadeer Tinwala, Michael J Turingan, Shahoon Khan, and Savraj  
6 S Grewal.

7

8 Clark H Smith Brain Tumour Centre, Arnie Charbonneau Cancer Institute, Alberta Children's Hospital  
9 Research Institute, and Department of Biochemistry and Molecular Biology Calgary, University of  
10 Calgary, Alberta T2N 4N1, Canada.

11

12 Lead contact: Savraj S Grewal ([grewalss@ucalgary.ca](mailto:grewalss@ucalgary.ca)).

13

14 Authors for correspondence: SSG ([grewalss@ucalgary.ca](mailto:grewalss@ucalgary.ca)) and SS-P ([spirahas@ucalgary.ca](mailto:spirahas@ucalgary.ca)).

15

16 **Keywords:** mitochondria, hemocytes, systemic growth, insulin signaling, cytokine TNF- $\alpha$ /Eiger, JNK  
17 signaling, TFAM, OxPhos, metabolism, *Drosophila*

## 18 **Summary**

19

20 **Macrophages play key roles in regulating and maintaining tissue and whole-body metabolism in both**  
21 **normal and disease states. While the cell-cell signaling pathway that underlie these functions are**  
22 **becoming clear, less is known about how alterations in macrophage metabolism influence their roles**  
23 **as regulators of systemic physiology. Here we investigate this by examining *Drosophila* macrophage-**  
24 **like cells called hemocytes. We used knockdown of TFAM, a mitochondrial genome transcription**  
25 **factor, to reduce mitochondrial OxPhos activity specifically in larval hemocytes. We find that this**  
26 **reduction in hemocyte OxPhos leads to a decrease in larval growth and body size. These effects are**  
27 **associated with a suppression of systemic insulin, the main endocrine stimulator of body growth. We**  
28 **also find that TFAM knockdown leads to decreased hemocyte JNK signaling and decreased**  
29 **expression of the TNF alpha homolog, Eiger in hemocytes. Furthermore, we show that genetic**  
30 **knockdown of hemocyte JNK signaling or Eiger expression mimics the effects of TFAM knockdown**  
31 **and leads to a non-autonomous suppression of body size but without altering hemocyte numbers.**  
32 **Our data suggest that modulation of hemocyte mitochondrial metabolism can determine their non-**  
33 **autonomous effects on organismal growth by altering cytokine and systemic insulin signaling. Given**  
34 **that mitochondrial metabolism can be controlled by nutrient availability, our findings may explain**  
35 **how macrophages function as nutrient-responsive regulators of tissue and whole-body physiology**  
36 **and homeostasis.**

37

## 38 **Introduction**

39

40 As animals develop, they need to coordinate growth across all their organs to ensure the proper  
41 attainment of functional body size. In most metazoans, this coordination relies on networks of organ-  
42 to-organ communication and endocrine signaling<sup>1-3</sup>. Defects in these networks and signaling pathways  
43 can impair development leading to growth disorders and lethality.

44

45 The versatility of *Drosophila* genetics has led them to become a valuable model system for deciphering  
46 the tissue-to-tissue signaling networks that control body growth<sup>2,4,5</sup>. In *Drosophila*, this growth occurs  
47 during the larval stage of development and is controlled by two main endocrine systems - insulin  
48 signaling and steroid ecdysone signaling - which determine both the rate of body growth and the

49 timing of larval maturation<sup>6,7</sup>. *Drosophila* contains eight insulins (termed *Drosophila* insulin-like  
50 peptides, dILPs), of which three (dILPs 2,3 and 5) are expressed and secreted from a cluster of  
51 neurosecretory cells in the brain termed insulin-producing cells (IPCs). These Dilps can circulate  
52 through hemolymph and stimulate cell, tissue and body growth by binding to a cell surface insulin  
53 receptor and activating a conserved PI3K/Akt kinase signaling pathway<sup>8</sup>. Ecdysone is a steroid hormone  
54 produced and secreted from the prothoracic gland (PG). Short pulses of ecdysone secretion are  
55 essential for timing the larval molts through early larval development, while a final, larger pulse of  
56 ecdysone triggers larval maturation to the pupal stage<sup>9</sup>. Several larval tissues can communicate with  
57 the IPC and the PG through secreted factors and cytokines to control the production and release of the  
58 dILPs and ecdysone<sup>2</sup>. In many cases, these tissues function as sensors of environmental factors - such  
59 as nutrition, pathogens, toxins, and oxygen - and, in turn, signal to the brain and PG to couple insulin  
60 and ecdysone production to these external changes<sup>7</sup>. These mechanisms of inter-organ communication  
61 allow larvae to appropriately tailor their growth and development rate to fluctuations in their  
62 environmental conditions.

63  
64 *Drosophila* hemocytes are macrophage like-cells that can control whole-body physiology and  
65 homeostasis<sup>10</sup>. Like mammalian macrophages, they engulf damaged or dying cells or pathogens, most  
66 often in the context of innate immune responses<sup>11-13</sup>. But recent studies have emphasized their  
67 importance as regulators of organismal physiology outside of immune responses. For example, genetic  
68 depletion of hemocytes in larvae impairs growth and development and can lead to lethality<sup>14-20</sup>. These  
69 effects are due, in part, to reduced systemic insulin signaling and altered nutrient storage<sup>15</sup>. In  
70 addition, hemocyte numbers are modulated by external factors such as nutrition, oxygen levels,  
71 infection, and odorants, which may provide one way that larvae couple changes in these  
72 environmental factors to control their development and homeostasis<sup>21,22</sup>. For example, starvation-  
73 mediated decreases in hemocyte numbers are required for larvae to survive in poor nutrient  
74 conditions<sup>23</sup>. The ability of hemocytes to impact whole-body responses rely mainly on their ability to  
75 communicate with other tissues through cytokine and secreted signaling molecules.  
76 For example, hemocytes can express and secrete upd3, a cytokine similar to mammalian interleukin-6.  
77 In larvae, hemocyte-derived upd3 can act on the fat body to suppress insulin signaling<sup>15</sup> and on the PG  
78 to suppress ecdysone production and delay development<sup>24</sup>. In adults, hemocyte-derived upd3  
79 mediates the impairment of systemic glucose metabolism and impaired lifespan caused by a high-fat

80 diet<sup>25</sup>. Another hemocyte-secreted factor, *pvf2*, a fly homolog of the PDGF/VEGF growth factors, can  
81 act on the PG to suppress ecdysone production and delay larval maturation in low nutrient  
82 conditions<sup>26</sup>. In addition, another hemocyte-expressed *pvf* ligand, *pvf3*, can signal to the fat body to  
83 control lipid storage<sup>27</sup>. These findings in *Drosophila* parallel those from mice where tissue-resident  
84 macrophages have been shown to influence both local and whole-body systemic metabolism<sup>28-32</sup>.

85  
86 These studies in flies and mammals emphasize the critical role that macrophages play in maintaining  
87 tissue and whole-body homeostasis beyond their phagocytic roles in immune responses to infection  
88 and tissue damage. However, little is known about macrophage metabolic responses that are  
89 important for regulating these systemic effects. Recent studies on immunity and infection in mice have  
90 shown that mitochondrial metabolic reprogramming of macrophages can determine their cytokine  
91 expression and immune responses<sup>33</sup>. For example, activated macrophages use mitochondrial-derived  
92 metabolites such as succinate and citrate to control the expression of interleukins and cytokines to  
93 mediate their inflammatory and immune roles<sup>34,35</sup>. In this paper, we have explored whether  
94 mitochondrial metabolism in *Drosophila* hemocytes impacts their proliferation and effects on systemic  
95 physiology and growth.

## 96 97 **Results**

### 98 99 **Lowering OxPhos activity in hemocytes leads to reduced hemocyte proliferation.**

100 To explore the effects of altered mitochondrial activity on hemocyte function, we used RNAi to knock  
101 down the mitochondrial transcription factor A, TFAM. TFAM is a nuclear-encoded transcription factor  
102 that localizes to mitochondria to transcribe the mitochondrial genome, including essential components  
103 of the electron transport chain. As a result, TFAM knockdown leads to reduced mitochondrial gene  
104 expression and OxPhos activity<sup>36,37</sup>. We used the hemocyte-driver *hml-Gal4* to direct *UAS-TFAM RNAi*  
105 transgenes specifically in the hemocytes. We found that TFAM knockdown reduced the intensity of  
106 mitoTracker Red staining in isolated hemocytes, indicating reduced mitochondrial activity (**Fig. 1A and**  
107 **1B**). We also saw that TFAM knockdown led to a significant reduction in hemocyte numbers, an effect  
108 seen with two independent RNAi lines (**Fig. 1C, 1D and Fig S1A**). In addition, TFAM knockdown  
109 prevented the increased hemocyte proliferation seen with expression of an activated form of Raf  
110 kinase, a component of the oncogenic Ras signaling pathway (**Fig. 1E**). Taken together, our results

111 demonstrate that lowering mitochondrial bioenergetic activity through TFAM knockdown in  
112 hemocytes can suppress their proliferation even in the presence of activated Ras signaling.

113

#### 114 **Hemocyte TFAM knockdown suppresses whole-body growth and development.**

115 Previous studies have shown that changes in hemocyte function can impact whole-body physiology.  
116 We, therefore, examined whether alterations in mitochondrial function bioenergetic activity might be  
117 important in these non-autonomous roles of hemocytes. We began by examining the effects on growth  
118 and development. We used RNAi to knock down TFAM in hemocytes and measured both time to  
119 pupation (as a measure of developmental rate) and pupal volume (as a measure of body size). We  
120 found that hemocyte TFAM knockdown using two independent RNAi lines led to a significant ~15-20%  
121 reduction in pupal volume (**Fig. 2A**). No effect on pupal volume was seen with transgenic flies carrying  
122 UAS-TFAM RNAi transgene alone (**Fig. S1B and S1C**). When we measured development timing, we saw  
123 a significant but minimal decrease in time to pupation (~3-6 hours) in animals with hemocyte TFAM  
124 knockdown (**Fig. 2B**), which is unlikely to explain the substantial reduction in pupal size. Here, our  
125 results demonstrate that lowering mitochondrial bioenergetic activity in the larval hemocytes can likely  
126 suppress body size by a reduction in overall larval growth rate.

127

#### 128 **Hemocyte TFAM knockdown suppresses systemic insulin signaling.**

129 We next explored how hemocyte TFAM knockdown might suppress overall body growth. One of the  
130 central regulators of growth in larvae is the endocrine insulin pathway. Flies have seven *Drosophila*  
131 insulin-like peptides (dILPs). These bind to a single insulin receptor and activate a conserved PI3  
132 Kinase/Akt kinase signaling pathway that can stimulate growth in all larval tissues. We found that  
133 hemocyte knockdown of TFAM led to reduced levels of whole-body phosphorylated Akt (**Fig. 3A and**  
134 **3B**), consistent with reduced systemic insulin signaling. One primary way insulin signaling is controlled  
135 is through the production and release of three dILPs (2, 3 and 5) from the insulin-producing cells (IPCs)  
136 in the brain<sup>8</sup>. We found that hemocyte TFAM knockdown did not affect the whole-body mRNA levels of  
137 any of the seven dILPs (**Fig. S2A**). However, when we used dILP2 antibody staining to examine the IPCs,  
138 we saw an accumulation of dILP protein (**Fig. 3C and 3D**), an effect characteristic of dILP2 retention due  
139 to reduced dILP2 secretion<sup>38</sup>. Taken together, our results suggest that one way that hemocyte-specific  
140 knockdown of TFAM leads to reduced body growth is by lowering brain-derived dILP secretion leading  
141 to suppressed systemic insulin signaling. One well-described target of the insulin/PI3K/Akt pathway is

142 the transcription factor FOXO, whose nuclear localization and transcriptional activity are usually  
143 inhibited by Akt. Interestingly, we found that hemocyte-specific TFAM RNAi didn't affect the whole-  
144 body expression levels of known FOXO target genes, 4E-BP, dILP6, and InR<sup>39,40</sup> (**Fig. S2B**). Furthermore,  
145 when we stained fat body tissue for FOXO, we observed a substantial decrease in total FOXO protein  
146 levels rather than any change in nuclear vs cytoplasmic localization (**Fig. 4A and 4B**). Levels of *foxo*  
147 mRNA were unchanged. Previous work showed that *foxo* null mutants had reduced final adult tissue  
148 and body size<sup>41</sup>. We found that *foxo* mutants had reduced pupal volume, and this size reduction was  
149 not further exacerbated by hemocyte TFAM knockdown (**Fig 4C**). These results show that lowering  
150 hemocyte OxPhos activity by TFAM knockdown can decrease systemic insulin signaling and reduce  
151 FOXO protein levels. Both effects may explain the decrease in whole-body growth.

152

153 **TFAM knockdown inhibits hemocyte JNK signaling pathway, and genetic suppression of hemocyte**  
154 **JNK signaling suppresses body growth.**

155 We next wanted to investigate the downstream effects of TFAM knockdown in hemocytes. Alterations  
156 in mitochondrial function have been shown to modulate JNK signaling pathway activity in *Drosophila*<sup>42</sup>.  
157 We there examined phosphorylation levels of the JNK. We found hemocytes with TFAM knockdown  
158 have significantly lower pJNK staining (**Fig. 5A and 5B**), suggesting that lowering mitochondrial OxPhos  
159 suppresses the JNK signaling pathway. To explore whether this decrease in JNK signaling might explain  
160 the effects of hemocyte TFAM knockdown on both hemocyte proliferation and body growth, we  
161 genetically inhibited JNK pathway activity in hemocytes by expression of either a dominant negative  
162 version of the JNK kinase, *Basket* (*BskDN*), or by RNAi-mediated knockdown of *Kayak* (*Kay RNAi*), a  
163 transcriptional target and effector of JNK signaling in flies. In both cases, we saw that inhibition of JNK  
164 signaling in hemocytes had no effects on hemocyte numbers (**Fig. 5C and 5E**), suggesting that  
165 suppression of JNK signaling does not explain the reduced hemocyte proliferation following TFAM  
166 knockdown. However, we saw that hemocyte-specific expression of either *BskDN* or hemocyte *Kay*  
167 *RNAi* led to a reduction in pupal volume (**Fig. 5D and 5F**) and that *Kay RNAi* had little effect on time to  
168 pupation (**Fig S3A**). In addition, we saw that the reduction in body size following hemocyte-specific  
169 knockdown of TFAM and *Kay* was comparable to the effects of either knockdown alone, suggesting  
170 both factors function similarly (**Fig 5F**). Together, our results suggest that one way that the reduction of  
171 OxPhos activity by TFAM knockdown suppresses whole-body growth through reduced activity of the  
172 JNK-signaling pathway and that these effects are independent of any changes in hemocyte number.

173

174 **Hemocyte Eiger expression is controlled by mitochondrial OxPhos and can regulate body size.**

175 Hemocytes express many different secreted factors that can impact whole-body physiology.

176 Interestingly, we observed a significant reduction in hemocyte mRNA levels of one such factor – the

177 TNF alpha homolog, Eiger – following TFAM knockdown in hemocytes (**Fig. 6A**). We also saw that

178 RNAi- mediated Eiger knockdown in hemocytes led to smaller body size (**Fig. 6B**) without any effect on

179 hemocyte number (**Fig. 6C**). Flies carrying just the UAS-Eiger RNAi transgene alone showed no

180 significant change in body size (**Fig. S3B**) These results suggest that one way that lowered hemocyte

181 mitochondrial OxPhos activity suppresses body growth is through altered cytokine signaling.

182

183 **Discussion**

184

185 Our main finding is that suppressing hemocyte mitochondrial OxPhos activity can exert both

186 autonomous and non-autonomous effects on growth (**Fig 7**). The autonomous effects involve a block in

187 hemocyte proliferation even when proliferation is stimulated by activation of the oncogenic Ras

188 pathway. This result is consistent with similar studies in mouse models of lung cancer showing that

189 mitochondrial metabolism is essential for Ras-mediated tumors<sup>36</sup>. The non-autonomous effect of

190 reduction in hemocyte OxPhos was suppression in overall body growth. The final pupal volume was

191 reduced, but developmental timing was only modestly accelerated. Therefore, we likely saw decreased

192 body size resulting from reduced overall growth rather than an acceleration of the growth period.

193 Consistent with this, we saw that the decrease in body growth caused by hemocyte TFAM knockdown

194 was accompanied by reduced whole body Akt phosphorylation and reduced dILP2 release from the

195 brain, pointing to a reduction in systemic insulin signaling, the main regulator of body growth.

196 Interestingly, we saw a reduction in FOXO protein levels, even though reduced insulin typically leads to

197 FOXO nuclear accumulation. However, regulation of FOXO protein levels has been observed previously

198 in *Drosophila*<sup>43,44</sup>. Interestingly, *foxo* null mutants have reduced body size, a phenotype that we also

199 see here and this body size phenotype we observed was not further exacerbated by hemocyte TFAM

200 knockdown. Therefore, hemocyte mitochondrial metabolism may control body growth by controlling

201 both brain-derived insulin signaling and regulation of FOXO levels.

202



203 One potential effector of reduced OxPhos activity in hemocytes is the reduction of JNK signaling. We  
204 saw that TFAM knockdown leads to reduced phosphorylation of JNK and that genetic suppression of  
205 JNK signaling in hemocytes could mimic the effects of TFAM knockdown reduced body size.  
206 Interestingly, the effects of JNK pathway suppression and TFAM knockdown on body size were not  
207 additive, suggesting they function in the same pathway. Our work also identified the hemocyte-  
208 expressed secreted factor, Eiger, as a potential link between changes in hemocyte OxPhos activity to  
209 control of body growth. We also saw that TFAM knockdown decreased Eiger mRNA expression in  
210 hemocytes and that hemocyte knockdown of Eiger mimicked the effects of TFAM knockdown and led  
211 to a reduction in body size. These results suggest that reduced hemocyte OxPhos activity may decrease  
212 Eiger expression to mediate non-autonomous effects on body size. Interestingly, fat derived Eiger can  
213 inhibit dILP secretion from IPCs<sup>45</sup>. Hence it may appear paradoxical that blocking hemocyte production  
214 of Eiger would lead to reduced body size. However, it is possible that the effects on body size we see  
215 with Eiger manipulation either occur independently of changes in systemic insulin signaling, or that the  
216 effects of Eiger on systemic insulin signaling may depend on the cell type it is expressed from (fat vs  
217 hemocytes).

218  
219 An interesting finding from our work was that the body size suppression caused by hemocyte  
220 suppression of JNK signaling or Eiger knockdown was independent of any change in hemocyte number.  
221 This suggests that the non-autonomous effects of hemocyte OxPhos reduction on body growth may  
222 not be because of changes in hemocyte number. Similarly, a recent report showed that the effects of  
223 hemocytes on developmental timing mediated by pvf2 signaling in response to low nutrients were also  
224 independent of hemocyte cell number<sup>26</sup>. In contrast, another study reports that a reduction in  
225 hemocyte numbers is needed for their effects on nutrient storage and survival in poor nutrients<sup>23</sup>.  
226 Thus, both the metabolic status and numbers of hemocytes are important for determining their impact  
227 on organismal physiology.

228  
229 A question prompted by our work is how does a reduction in hemocyte mitochondrial OxPhos activity  
230 lead to suppression of JNK signaling and Eiger expression? One possibility is that these effects are  
231 caused by alterations in reactive oxygen species (ROS) levels. The mitochondrial electron transport  
232 chain is a major source of ROS production in cells, and JNK is stimulated by ROS levels<sup>46,47</sup>. Thus, TFAM  
233 knockdown, by lowering OxPhos activity, may limit ROS production and thereby reduce JNK activity.



234 Additionally, a reduction in OxPhos may reprogram mitochondrial metabolism leading to alterations in  
235 TCA cycle intermediates. Changes in the levels of these metabolites, such as succinate and citrate, have  
236 previously been shown to couple mitochondrial metabolism in activated mammalian macrophages to  
237 the expression of cytokines by altering the activity of chromatin modifiers<sup>33,48</sup>. Hence, a similar  
238 mechanism may regulate Eiger expression in hemocytes.

239

240 Macrophages play multiple essential roles in regulating tissue and whole-body metabolic homeostasis<sup>28-</sup>  
241 <sup>32</sup>. These general regulatory roles of macrophages are seen in both invertebrates and vertebrates and  
242 are often influenced by changes in nutrients<sup>27,29</sup>. Given that regulation of mitochondrial metabolism is  
243 a downstream target of many conserved nutrient-responsive signaling pathways<sup>49</sup>, our findings suggest  
244 that changes in mitochondrial metabolism may link the nutrient-sensing properties of macrophages to  
245 their role as regulators of metabolic homeostasis.

246

## 247 **Methods**

248

### 249 **Drosophila food and genetics.**

250 Flies were raised on a medium containing 150 g agar, 1600 g cornmeal, 770 g Torula yeast, 675 g  
251 sucrose, 2340 g D-glucose, 240 ml acid mixture (propionic acid/phosphoric acid) per 34 L water and  
252 maintained at 25 °C. For all GAL4/UAS experiments, homozygous GAL4 lines were crossed to the  
253 relevant UAS line(s) and the larval progeny were analyzed. Control animals were obtained by crossing  
254 the appropriate homozygous GAL4 line to flies of the same genetic background as the relevant  
255 experimental UAS transgene line.

256

### 257 **Drosophila Strains**

258 The following strains were used: *w<sup>1118</sup>*, *hml-GAL4*, *UAS-GFP*, *UAS-Eiger RNAi* (VDRC 108814), GD control  
259 line (60000 TK), KK control line (VDRC 60100 TK), *UAS-Kayak-RNAi* (VDRC 6212 GD), *UAS-TFAM RNAi #2*  
260 (*4217R-2*), *UAS-TFAM RNAi #3* (*4217R-3 -Fly Stocks of National Institute of Genetics - NIG-FLY*),  
261 *foxo<sup>A94</sup>* (gift from Linda Partridge)<sup>41</sup>.

262

### 263 **Measurement of *Drosophila* developmental time**

264 For measuring development timing to the pupal stage, newly hatched larvae were collected at 24 hrs  
265 AEL and placed in food vials (50 larvae per vial). The number of newly formed pupae was counted twice  
266 a day until all larvae had pupated.

267

### 268 **Pupal imaging and pupal volume measurement**

269 Pupae were imaged using a Zeiss Discovery V8 Stereomicroscope with Axiovision imaging software.

270 Pupal length and width were measured, and pupal volume was calculated using the formula,

271  $\text{volume} = 4/3\pi(L/2)(l/2)^2$ .

272

### 273 **Quantification of hemocyte number**

274 To assay for hemocyte numbers, we used an *hml-GAL4, UAS-GFP*, to GFP-label hemocytes. Larvae were  
275 collected during the L3 wandering larval stage using forceps and cleaned by being placed in a small  
276 petri dish containing 5 mL of phosphate buffered saline (PBS) for 30 seconds. The clean larvae were  
277 then transferred to another small petri dish and fluorescence-imaged using ZEISS SteREO Discovery V8  
278 microscope and ZEN imaging software (blue edition) at 8.0x magnification. Next, the NIH ImageJ  
279 software was used to quantify the fluorescence intensity in a defined region in posterior segments of  
280 each larvae where hemocytes are clustered. This value was then corrected for background  
281 autofluorescence by subtracting the average fluorescence intensity measured from unlabeled *w<sup>1118</sup>* L3  
282 wandering larvae.

283

### 284 **MitoTracker Red staining**

285 Hemocytes from 96hrs AEL larvae were collected and stained with MitoTracker Deep Red FM (1: 1000  
286 dilution of 1 mM, Molecular probes M22426) for 40 mins and fixed at room temperature using 8% PFA  
287 for 30 mins. After washing three times, mounted using Vecta Shield mounting medium. The  
288 mitochondrial images were acquired through Zeiss confocal microscope LSM 880.

289

### 290 **Preparation of larval protein extracts**

291 *Drosophila* larvae (96 hrs. AEL) were lysed with homogenization and sonication in a buffer containing  
292 20 mM Tris-HCl (pH 8.0), 137 mM NaCl, 1 mM EDTA, 25% glycerol, 1% NP-40 and with the following  
293 inhibitors: 50 mM NaF, 1 mM PMSF, 1 mM DTT, 5 mM sodium ortho vanadate ( $\text{Na}_3\text{VO}_4$ ) and Protease

294 Inhibitor cocktail (Roche Cat. No. 04693124001) and Phosphatase inhibitor (Roche Cat. No.  
295 04906845001), according to the manufacturer instructions.

296

### 297 **Western blots, immunostaining and antibodies**

298 Protein concentrations were measured using the Bio-Rad Dc Protein Assay kit II (Bio-Rad 5000112).  
299 Protein lysates (100 µg) were resolved by SDS-PAGE and electro transferred to a nitrocellulose  
300 membrane, subjected to western blot analysis with specific antibodies, and visualized by  
301 chemiluminescence (enhanced ECL solution (Perkin Elmer)). The primary antibodies used in this study  
302 were: anti-phospho-AKT-Ser505 (1:1000, Cell Signaling Technology #4054), anti-actin (1:1000, Santa  
303 Cruz Biotechnology, # sc-8432), anti-dILP<sup>50</sup> (1:500), and anti-phospho-JNK (1:500, Cell Signaling  
304 Technolog #4668S). Goat and donkey secondary antibodies were purchased from Santa Cruz  
305 Biotechnology (sc-2030, 2005, 2020). The rabbit anti-FOXO antibody was used at 1:500 dilution for fat  
306 body immunostaining (a gift from Marc Tatar).

307

### 308 **Larval brain staining**

309 Larval brains were dissected and fixed for 30 min in 4% formaldehyde in PBS, washed three times in  
310 PBS with 0.1% Triton X-100 (PBT). Tissues were then pre-blocked in PBT + 5% BSA + 2% fetal bovine  
311 serum for 2 hrs and then incubated overnight at 4°C with the primary antibody (1:1000 dilution of anti-  
312 dILP2) in 5% BSA+ PBT, and then washed three times in PBT+0.5% BSA. A cocktail of secondary  
313 antibodies was then added to the block (final concentration 1:400) and the tissues were incubated  
314 overnight in secondary at 4°C. The samples were then washed 3× for 15 min each time, with PBT+0.5%  
315 BSA and mounted on slides. Brains were imaged using Zeiss Stereo Discovery V8 microscope using  
316 Axiovision software.

317

### 318 **Quantitative RT-PCR measurements**

319 Total RNA was extracted from hemocytes collected from 20 larvae at 120h AEL or from total larval  
320 lysates at 96h AEL using TRIzol according to manufacturer's instructions (Invitrogen; 15596-018). RNA  
321 samples isolated from the same number of larvae (control vs experimental) were DNase treated  
322 (Ambion; 2238G) and reverse transcribed using Superscript II (Invitrogen; 100004925). The generated  
323 cDNA was used as a template to perform qRT-PCRs (ABI 7500 real time PCR system using SyBr Green

324 PCR mix) using gene-specific primers. PCR data were normalized to RpL32. All primer sequences are  
325 listed in the supplementary table S1.

326

### 327 **Statistical analysis**

328 All qRT-PCR data and quantification of immunostaining data were analyzed by Students t-test, two-way  
329 ANOVA followed by post-hoc students t-test, or Mann-Whitney U test where appropriate. All statistical  
330 analysis and data plots were performed using Prism statistical software. Differences were considered  
331 significant when p values were less than 0.05.

332

### 333 **References**

334

- 335 1 Droujinine, I. A. & Perrimon, N. Interorgan Communication Pathways in Physiology: Focus on  
336 *Drosophila*. *Annual review of genetics* **50**, 539-570, doi:10.1146/annurev-genet-121415-122024  
337 (2016).
- 338 2 Texada, M. J., Koyama, T. & Rewitz, K. Regulation of Body Size and Growth Control. *Genetics*  
339 **216**, 269-313, doi:10.1534/genetics.120.303095 (2020).
- 340 3 Boulan, L., Milan, M. & Leopold, P. The Systemic Control of Growth. *Cold Spring Harb Perspect*  
341 *Biol* **7**, doi:10.1101/cshperspect.a019117 (2015).
- 342 4 Grewal, S. S. Controlling animal growth and body size - does fruit fly physiology point the way?  
343 *F1000 Biol Rep* **4**, 12, doi:10.3410/B4-12 (2012).
- 344 5 Andersen, D. S., Colombani, J. & Leopold, P. Coordination of organ growth: principles and  
345 outstanding questions from the world of insects. *Trends in cell biology* **23**, 336-344,  
346 doi:10.1016/j.tcb.2013.03.005 (2013).
- 347 6 Danielsen, E. T., Moeller, M. E. & Rewitz, K. F. Nutrient signaling and developmental timing of  
348 maturation. *Curr Top Dev Biol* **105**, 37-67, doi:10.1016/B978-0-12-396968-2.00002-6 (2013).
- 349 7 Koyama, T., Texada, M. J., Halberg, K. A. & Rewitz, K. Metabolism and growth adaptation to  
350 environmental conditions in *Drosophila*. *Cell Mol Life Sci* **77**, 4523-4551, doi:10.1007/s00018-  
351 020-03547-2 (2020).
- 352 8 Grewal, S. S. Insulin/TOR signaling in growth and homeostasis: a view from the fly world. *Int J*  
353 *Biochem Cell Biol* **41**, 1006-1010, doi:10.1016/j.biocel.2008.10.010 (2009).

- 354 9 Yamanaka, N., Rewitz, K. F. & O'Connor, M. B. Ecdysone control of developmental transitions:  
355 lessons from *Drosophila* research. *Annu Rev Entomol* **58**, 497-516, doi:10.1146/annurev-ento-  
356 120811-153608 (2013).
- 357 10 Banerjee, U., Girard, J. R., Goins, L. M. & Spratford, C. M. *Drosophila* as a Genetic Model for  
358 Hematopoiesis. *Genetics* **211**, 367-417, doi:10.1534/genetics.118.300223 (2019).
- 359 11 Parsons, B. & Foley, E. Cellular immune defenses of *Drosophila melanogaster*. *Dev Comp*  
360 *Immunol* **58**, 95-101, doi:10.1016/j.dci.2015.12.019 (2016).
- 361 12 Gold, K. S. & Bruckner, K. Macrophages and cellular immunity in *Drosophila melanogaster*.  
362 *Semin Immunol* **27**, 357-368, doi:10.1016/j.smim.2016.03.010 (2015).
- 363 13 Wang, L., Kounatidis, I. & Ligoxygakis, P. *Drosophila* as a model to study the role of blood cells in  
364 inflammation, innate immunity and cancer. *Front Cell Infect Microbiol* **3**, 113,  
365 doi:10.3389/fcimb.2013.00113 (2014).
- 366 14 P, P., Tomar, A., Madhwal, S. & Mukherjee, T. Immune Control of Animal Growth in  
367 Homeostasis and Nutritional Stress in *Drosophila*. *Front Immunol* **11**, 1528,  
368 doi:10.3389/fimmu.2020.01528 (2020).
- 369 15 Shin, M., Cha, N., Koranteng, F., Cho, B. & Shim, J. Subpopulation of Macrophage-Like  
370 Plasmacytes Attenuates Systemic Growth via JAK/STAT in the *Drosophila* Fat Body. *Front*  
371 *Immunol* **11**, 63, doi:10.3389/fimmu.2020.00063 (2020).
- 372 16 Charroux, B. & Royet, J. Elimination of plasmacytes by targeted apoptosis reveals their role in  
373 multiple aspects of the *Drosophila* immune response. *Proc Natl Acad Sci U S A* **106**, 9797-9802,  
374 doi:10.1073/pnas.0903971106 (2009).
- 375 17 Stephenson, H. N., Streeck, R., Grublinger, F., Goosmann, C. & Herzig, A. Hemocytes are  
376 essential for *Drosophila melanogaster* post-embryonic development, independent of control of  
377 the microbiota. *Development* **149**, doi:10.1242/dev.200286 (2022).
- 378 18 Arefin, B. *et al.* Apoptosis in Hemocytes Induces a Shift in Effector Mechanisms in the  
379 *Drosophila* Immune System and Leads to a Pro-Inflammatory State. *PLoS One* **10**, e0136593,  
380 doi:10.1371/journal.pone.0136593 (2015).
- 381 19 Defaye, A. *et al.* Genetic ablation of *Drosophila* phagocytes reveals their contribution to both  
382 development and resistance to bacterial infection. *J Innate Immun* **1**, 322-334,  
383 doi:10.1159/000210264 (2009).

- 384 20 Shia, A. K. *et al.* Toll-dependent antimicrobial responses in *Drosophila* larval fat body require  
385 Spatzle secreted by haemocytes. *J Cell Sci* **122**, 4505-4515, doi:10.1242/jcs.049155 (2009).
- 386 21 Cho, B. *et al.* Systemic control of immune cell development by integrated carbon dioxide and  
387 hypoxia chemosensation in *Drosophila*. *Nat Commun* **9**, 2679, doi:10.1038/s41467-018-04990-3  
388 (2018).
- 389 22 Bakopoulos, D. *et al.* Insulin-Like Signaling Influences the Coordination of Larval Hemocyte  
390 Number with Body Size in *Drosophila melanogaster*. *G3 (Bethesda)* **10**, 2213-2220,  
391 doi:10.1534/g3.120.401313 (2020).
- 392 23 Ramond, E. *et al.* The adipokine NimrodB5 regulates peripheral hematopoiesis in *Drosophila*.  
393 *FEBS J* **287**, 3399-3426, doi:10.1111/febs.15237 (2020).
- 394 24 Romao, D., Muzzopappa, M., Barrio, L. & Milan, M. The Upd3 cytokine couples inflammation to  
395 maturation defects in *Drosophila*. *Current biology : CB* **31**, 1780-1787 e1786,  
396 doi:10.1016/j.cub.2021.01.080 (2021).
- 397 25 Woodcock, K. J. *et al.* Macrophage-derived upd3 cytokine causes impaired glucose homeostasis  
398 and reduced lifespan in *Drosophila* fed a lipid-rich diet. *Immunity* **42**, 133-144,  
399 doi:10.1016/j.immuni.2014.12.023 (2015).
- 400 26 Juarez-Carreño, S. & Geissmann, F. The macrophage genetic cassette *inr/dtor/pvf2* is a  
401 nutritional status checkpoint for developmental timing. *bioRxiv*, 2023.2001.2005.522883,  
402 doi:10.1101/2023.01.05.522883 (2023).
- 403 27 Cox, N. *et al.* Diet-regulated production of PDGF $\alpha$  by macrophages controls energy storage.  
404 *Science (New York, N.Y.)* **373**, doi:10.1126/science.abe9383 (2021).
- 405 28 Cox, N. & Geissmann, F. Macrophage ontogeny in the control of adipose tissue biology. *Curr*  
406 *Opin Immunol* **62**, 1-8, doi:10.1016/j.coi.2019.08.002 (2020).
- 407 29 Cox, N., Pokrovskii, M., Vicario, R. & Geissmann, F. Origins, Biology, and Diseases of Tissue  
408 Macrophages. *Annu Rev Immunol* **39**, 313-344, doi:10.1146/annurev-immunol-093019-111748  
409 (2021).
- 410 30 Okabe, Y. & Medzhitov, R. Tissue biology perspective on macrophages. *Nat Immunol* **17**, 9-17,  
411 doi:10.1038/ni.3320 (2016).
- 412 31 Jaitin, D. A. *et al.* Lipid-Associated Macrophages Control Metabolic Homeostasis in a Trem2-  
413 Dependent Manner. *Cell* **178**, 686-698 e614, doi:10.1016/j.cell.2019.05.054 (2019).

- 414 32 Pirzgalska, R. M. *et al.* Sympathetic neuron-associated macrophages contribute to obesity by  
415 importing and metabolizing norepinephrine. *Nature medicine* **23**, 1309-1318,  
416 doi:10.1038/nm.4422 (2017).
- 417 33 Ryan, D. G. & O'Neill, L. A. J. Krebs Cycle Reborn in Macrophage Immunometabolism. *Annu Rev*  
418 *Immunol* **38**, 289-313, doi:10.1146/annurev-immunol-081619-104850 (2020).
- 419 34 Tannahill, G. M. *et al.* Succinate is an inflammatory signal that induces IL-1beta through HIF-  
420 1alpha. *Nature* **496**, 238-242, doi:10.1038/nature11986 (2013).
- 421 35 Williams, N. C. & O'Neill, L. A. J. A Role for the Krebs Cycle Intermediate Citrate in Metabolic  
422 Reprogramming in Innate Immunity and Inflammation. *Front Immunol* **9**, 141,  
423 doi:10.3389/fimmu.2018.00141 (2018).
- 424 36 Hamanaka, R. B., Weinberg, S. E., Reczek, C. R. & Chandel, N. S. The Mitochondrial Respiratory  
425 Chain Is Required for Organismal Adaptation to Hypoxia. *Cell reports* **15**, 451-459,  
426 doi:10.1016/j.celrep.2016.03.044 (2016).
- 427 37 Sriskanthadevan-Pirahas, S. *et al.* Adipose mitochondrial metabolism controls body growth by  
428 modulating systemic cytokine and insulin signaling. *Cell reports* **39**, 110802,  
429 doi:10.1016/j.celrep.2022.110802 (2022).
- 430 38 Geminard, C., Rulifson, E. J. & Leopold, P. Remote control of insulin secretion by fat cells in  
431 *Drosophila*. *Cell metabolism* **10**, 199-207, doi:10.1016/j.cmet.2009.08.002 (2009).
- 432 39 Birnbaum, A., Wu, X., Tatar, M., Liu, N. & Bai, H. Age-Dependent Changes in Transcription  
433 Factor FOXO Targeting in Female *Drosophila*. *Front Genet* **10**, 312,  
434 doi:10.3389/fgene.2019.00312 (2019).
- 435 40 Alic, N. *et al.* Genome-wide dFOXO targets and topology of the transcriptomic response to  
436 stress and insulin signaling. *Mol Syst Biol* **7**, 502, doi:10.1038/msb.2011.36 (2011).
- 437 41 Slack, C., Giannakou, M. E., Foley, A., Goss, M. & Partridge, L. dFOXO-independent effects of  
438 reduced insulin-like signaling in *Drosophila*. *Aging Cell* **10**, 735-748, doi:10.1111/j.1474-  
439 9726.2011.00707.x (2011).
- 440 42 Borch Jensen, M., Qi, Y., Riley, R., Rabkina, L. & Jasper, H. PGAM5 promotes lasting FoxO  
441 activation after developmental mitochondrial stress and extends lifespan in *Drosophila*. *eLife* **6**,  
442 doi:10.7554/eLife.26952 (2017).
- 443 43 Nam, S., Le, T. P., Chung, S. & Choi, K. W. Tctp regulates the level and localization of Foxo for  
444 cell growth in *Drosophila*. *Cell Death Discov* **8**, 146, doi:10.1038/s41420-022-00937-2 (2022).



- 445 44 Poe, A. R. *et al.* Low FoxO expression in Drosophila somatosensory neurons protects dendrite  
446 growth under nutrient restriction. *eLife* **9**, doi:10.7554/eLife.53351 (2020).
- 447 45 Agrawal, N. *et al.* The Drosophila TNF Eiger Is an Adipokine that Acts on Insulin-Producing Cells  
448 to Mediate Nutrient Response. *Cell metabolism* **23**, 675-684, doi:10.1016/j.cmet.2016.03.003  
449 (2016).
- 450 46 Gera, J., Budakoti, P., Suhag, M., Mandal, L. & Mandal, S. Physiological ROS controls Upd3-  
451 dependent modeling of ECM to support cardiac function in Drosophila. *Sci Adv* **8**, eabj4991,  
452 doi:10.1126/sciadv.abj4991 (2022).
- 453 47 Santabarbara-Ruiz, P. *et al.* ROS-Induced JNK and p38 Signaling Is Required for Unpaired  
454 Cytokine Activation during Drosophila Regeneration. *PLoS genetics* **11**, e1005595,  
455 doi:10.1371/journal.pgen.1005595 (2015).
- 456 48 Van den Bossche, J., O'Neill, L. A. & Menon, D. Macrophage Immunometabolism: Where Are  
457 We (Going)? *Trends Immunol* **38**, 395-406, doi:10.1016/j.it.2017.03.001 (2017).
- 458 49 de la Cruz Lopez, K. G., Toledo Guzman, M. E., Sanchez, E. O. & Garcia Carranca, A. mTORC1 as a  
459 Regulator of Mitochondrial Functions and a Therapeutic Target in Cancer. *Front Oncol* **9**, 1373,  
460 doi:10.3389/fonc.2019.01373 (2019).

461

## 462 **Acknowledgements**

463 We thank Linda Partridge and Kim Rewitz for the gift of fly stocks and antibodies. Stocks obtained from  
464 the VDRC, the NIG-Fly Stock Centre, Kyoto, Japan, and the Bloomington Drosophila Stock Center (NIH  
465 P40OD018537) were used in this study. This work was supported by CIHR Project Grants (PJT-173517,  
466 PJT-152892) and Cancer Research Society grants to S.S.G. M.J.T. was supported by an NSERC summer  
467 studentship.

468

## 469 **Author contributions**

470 SS-P and SSG conceived and managed the project. SS-P, AQT, MJT and SK performed experiments and  
471 analyzed data. SS-P and SG drafted and revised the manuscript with feedback from all authors.

472

## 473 **Data availability statement**

474 All data needed to evaluate the conclusions in the paper are present in the paper and/or the  
475 Supplementary Materials. The datasets used and/or analysed during the current study are available  
476 from the corresponding author.

477

## 478 **Competing interests**

479 The author(s) declare no competing interests.

480

## 481 **Figure Legends**

482

### 483 **Figure 1. Low bioenergetic activity in hemocytes leads to reduced hemocyte proliferation.**

484 (A) Representative confocal micrographs of hemocyte mitochondria from control (*hml* > +) versus  
485 TFAM RNAi (*hml* > *UAS-TFAM-RNAi*) larvae at 96 hrs AEL stained with MitoTracker Red. The scale bars  
486 indicate 10  $\mu\text{m}$ .

487 (B) Quantification of MitoTracker Red staining intensity in (A). Data are presented as box plots (25%,  
488 median and 75% values) with error bars indicating the min and max values (\* $p < 0.05$ , unpaired t-test).  
489  $n$  (# of samples) = 21 (control) and 25 (TFAM-RNAi).

490 (C) Representative images of hemocytes labeled with GFP from control (*hml* > +) versus TFAM RNAi  
491 (*hml* > *UAS-TFAM-RNAi*) larvae at wandering stage (~144 h AEL). The scale bars indicate 100  $\mu\text{m}$ .

492 (D) Quantification of GFP fluorescent intensity in (C). Data are represented as mean  $\pm$  SEM, with  
493 individual data points plotted as symbols (\* $p < 0.05$ , unpaired t-test).  $n$  (# of samples) = 21 (control)  
494 and 27 (TFAM-RNAi). See also Figure S1A.

495 (E) Quantification of relative fluorescent intensity of GFP-labelled hemocytes in control (*hml* > +)  
496 versus  $\text{Raf}^{\text{GOF}}$  (*hml* > *UAS-Raf<sup>GOF</sup>*) and control (*hml* > +) versus  $\text{Raf}^{\text{GOF}}$  combined with TFAM-RNAi (*hml* >  
497 *UAS TFAM-RNAi, UAS-Raf<sup>GOF</sup>*). Data are represented as mean  $\pm$  SEM, with individual data points  
498 plotted as symbols (\* $p < 0.05$  and ns, not significant, unpaired t-test).  $n$  (# of samples) = 14 (control) vs  
499 12 ( $\text{Raf}^{\text{GOF}}$ ) and 26 (control) vs 21 (TFAM-RNAi +  $\text{Raf}^{\text{GOF}}$ ).

500

### 501 **Figure 2. Hemocyte TFAM knock down suppresses systemic growth and development.**

502 (A) Relative change in pupal volume was calculated based on the average value of control (*hml* > +)  
503 animals. Data are presented as mean  $\pm$  SEM (\* $p < 0.05$ , Mann-Whitney U test) for controls and two

504 different TFAM RNAi lines (*hml* > *TFAM-RNAi*). n (# of pupae) = 183 (control) vs 195 (TFAM RNAi<sup>#1</sup>) and  
505 199 (control) vs 179 (TFAM RNAi<sup>#2</sup>). See also Figure S1B.

506 (B) Time to pupation was measured in control (*hml* > +) larvae versus larvae expressing one of two  
507 different TFAM RNAi transgenes (*hml* > *UAS-TFAM RNAi*). Data are presented as mean time to  
508 pupation +/- SEM (\*p < 0.05, Mann-Whitney U test). n (# of pupae) = 171 (control) vs 135 (TFAM  
509 RNAi<sup>#1</sup>) and 179 (control) vs 107 (TFAM RNAi<sup>#2</sup>). See also Figure S1C.

510

511 **Figure 3. Hemocyte TFAM knock suppresses systemic insulin signaling by inhibiting dILP2 secretion**  
512 **from brain IPCs.**

513 (A) Western blots of whole-body samples from control (*hml* > +) versus TFAM RNAi (*hml* > *UAS-TFAM-*  
514 *RNAi*) larvae at 96hrs AEL analyzed using Phospho-Akt and actin antibodies.

515 (B) Quantification of western blots from (A). Data are relative levels of phospho-Akt band intensity  
516 corrected for actin band intensity. Data are presented as box plots (25%, median and 75% values) with  
517 error bars indicating the min and max values (\*p < 0.05 unpaired t-test, n = 7 (control) and 9 (TFAM  
518 RNAi) groups per condition with 20 larvae in each group).

519 (C) Representative images for brain IPCs stained with dILP2 in control (*hml* > +) versus TFAM RNAi (*hml*  
520 > *UAS-TFAM-RNAi*) larvae at 96 hrs AEL larvae. The scale bars indicate 20  $\mu$ m.

521 (D) Quantification of relative dILP2 fluorescent intensity in (C). Data are represented as mean  $\pm$  SEM,  
522 with individual data points plotted as symbols (\*p < 0.05, unpaired t-test). n (# of samples) = 37  
523 (control) and 24 (TFAM-RNAi).

524

525 **Figure 4. Hemocyte TFAM knock down leads to suppression of fat body FOXO levels.**

526 (A) Representative images for fat body stained with anti-FOXO antibodies from control (*hml* > +) versus  
527 TFAM RNAi (*hml* > *UAS-TFAM-RNAi*) larvae at 96 hrs AEL larvae. The scale bars represent 20  $\mu$ m.

528 (B) Quantification of relative FOXO fluorescent intensity in the fat body cytoplasm and nucleus (C).

529 Data are presented as box plots (25%, median and 75% values) with error bars indicating the min and  
530 max values (\*p < 0.05, unpaired t-test). n (# of fat cells) = 128 (control) and 124 (TFAM-RNAi).

531 (C) Relative change in pupal volume was calculated based on the average value of control (*hml*>+)   
532 animals. Data are presented as mean +/- SEM (\*p < 0.05 and ns, not significant, Mann-Whitney U test)   
533 for control (*hml* > +, *foxo*<sup>494</sup>/+), TFAM RNAi (*hml* > *UAS-TFAM-RNAi*, *foxo*<sup>494</sup>/+), *foxo*<sup>494</sup> (*hml*> +,

534 *foxo<sup>Δ94</sup>/foxo<sup>Δ94</sup>*), and TFAM-RNAi + *foxo<sup>Δ94</sup>* (*hml > UAS-TFAM RNAi, foxo<sup>Δ94</sup>/foxo<sup>Δ94</sup>*). n (# of pupae) = 73  
535 (control), 224 (TFAM RNAi), 107 (*foxo<sup>Δ94</sup>*), and 97 (TFAM RNAi + *foxo<sup>Δ94</sup>*).

536

537 **Figure 5. Hemocyte specific knock down of JNK signaling suppresses systemic growth.**

538 (A) Representative images for hemocytes stained with phospho-JNK (pJNK) in control (*hml > +*) versus  
539 TFAM RNAi (*hml > UAS-TFAM-RNAi*) larvae at 96 hrs AEL larvae. The scale bars represent 5 μm.

540 (B) Quantification of relative pJNK fluorescent intensity in hemocytes (A). Data are presented as box  
541 plots (25%, median and 75% values) with error bars indicating the min and max values (\*p < 0.05,  
542 unpaired t-test). n (# of hemocytes) = 36 (control) and 36 (TFAM-RNAi).

543 (C) Quantification of relative fluorescent intensity of GFP-labelled hemocytes in control (*hml > +*)  
544 versus Bsk<sup>DN</sup> (*hml > Bsk<sup>DN</sup>*). Data are represented as mean ± SEM, with individual data points plotted as  
545 symbols (\*p < 0.05 and ns, not significant, unpaired t-test). n (# of samples) = 20 (control) and 22  
546 (Bsk<sup>DN</sup>).

547 (D) Relative change in pupal volume was calculated based on the average value of control (*hml > +*)  
548 animals. Data are presented as mean +/- SEM (\*p < 0.05 and ns, not significant, Mann-Whitney U test)  
549 for control (*hml > +*) vs Bsk<sup>DN</sup> (*hml > Bsk<sup>DN</sup>*) animals. n (# of pupae) = 206 (control), 206 (Bsk<sup>DN</sup>).

550 (E) Quantification of relative fluorescent intensity of GFP-labelled hemocytes in control (*hml > +*),  
551 TFAM RNAi (*hml > UAS-TFAM RNAi*), Kay RNAi (*hml > UAS-Kay RNAi*) and TFMA RNAi + Kay RNAi (*hml >*  
552 *UAS-TFAM RNAi + UAS-Kay RNAi*) larvae. Data are represented as mean ± SEM, with individual data  
553 points plotted as symbols (\*p < 0.05 and ns, not significant, unpaired t-test). n (# of samples) = 35  
554 (control), 35 (TFAM RNAi), 24 (Kay RNAi), and 42 (TFAM RNAi + Kay RNAi).

555 (F) Relative change in pupal volume was calculated based on the average value of control (*hml>+*)  
556 animals. Pupal volume data analysis in control (*hml > +*), TFAM RNAi (*hml > UAS-TFAM RNAi*), Kay  
557 RNAi (*hml > UAS-Kay RNAi*) and TFMA RNAi + Kay RNAi (*hml > UAS-TFAM RNAi + UAS-Kay RNAi*) larvae.  
558 Data are represented as mean ± SEM, with individual data points plotted as symbols (\*p < 0.05 and ns,  
559 not significant, unpaired t-test). n (# of samples) = 180 (control), 202 (TFAM RNAi), 213 (Kay RNAi), and  
560 200 (TFAM RNAi + Kay RNAi).

561

562 **Figure 6. Hemocyte specific cytokine knock down suppresses body growth.**

563 (A) Hemocyte specific Eiger mRNA levels measured by qRT-PCR in control (*hml > +*) versus TFAM RNAi  
564 (*hml > UAS-TFAM-RNAi*) larvae at 120 hrs AEL. Data are represented as mean ± SEM, with individual

565 data points plotted as symbols (\*p < 0.05 and ns, not significant, unpaired t-test). n (# of samples) = 7  
566 (control) and 13 (TFAM RNAi).

567 (B) Relative change in pupal volume of control (*hml* > +) versus Eiger RNAi (*hml* > *UAS-Eiger RNAi*)  
568 larvae. Data are presented as mean +/- SEM (\*p < 0.05 and ns, not significant, Mann-Whitney U test). n  
569 (# of pupae) = 187 (control), 165 (Eiger RNAi).

570 (C) Quantification of relative fluorescent intensity of GFP-labelled hemocytes in control (*hml* > +)  
571 versus Eiger RNAi (*hml* > *UAS-Eiger RNAi*) larvae. Data are represented as mean ± SEM, with individual  
572 data points plotted as symbols (\*p < 0.05 and ns, not significant, unpaired t-test). n (# of samples) = 25  
573 (control) and 24 (Eiger RNAi).

574

575 **Figure 7. Low bioenergetic mitochondrial activity in hemocyte leads to suppression of systemic**

576 **insulin signaling.** When hemocyte mitochondrial OxPhos activity is low (for example following TFAM  
577 knockdown), expression of Eiger and the activity of the JNK pathway are reduced. Under these  
578 conditions, dILP2 secretion from the brain IPC cells and systemic insulin signaling are reduced leading  
579 to reduced animal growth and development.

580

581 **Figure S1: TFAM knock down in hemocytes suppresses hemocyte proliferation and systemic growth**  
582 **(related to Fig. 1 and 2)**

583 (A) Quantification of relative fluorescent intensity of GFP-labelled hemocytes from control (*hml*>+)   
584 versus TFAM RNAi<sup>#2</sup> (*hml*>*UAS-TFAM-RNAi*) larvae at wandering stage. Data are represented as mean ±   
585 SEM, with individual data points plotted as symbols (\*p < 0.05, unpaired t-test). n (# of samples) = 16   
586 (control) and 23 (TFAM-RNAi<sup>#2</sup>).

587 (B) Relative change in pupal volume was calculated based on the average value of control (+/+)   
588 animals. Data are presented as mean +/- SEM (\*p < 0.05, Mann-Whitney U test) for controls and two   
589 different TFAM RNAi lines (+/*UAS-TFAM-RNAi*). n (# of pupae) = 147 (control) vs 148 (TFAM RNAi<sup>#1</sup>) and   
590 147 (control) vs 146 (TFAM RNAi<sup>#2</sup>).

591 (C) Time to pupation was measured in control (+/+) larvae versus larvae expressing one of two   
592 different TFAM RNAi transgenes (+/*UAS-TFAM RNAi*). Data are presented as mean time to pupation   
593 +/- SEM (\*p < 0.05, Mann-Whitney U test). n (# of pupae) = 590 (control) vs 675 (TFAM RNAi<sup>#1</sup>) and   
594 590 (control) vs 592 (TFAM RNAi<sup>#2</sup>).

595

596 **Figure S2: Hemocyte TFAM knock down shows no change in whole larvae mRNA levels of *dILPs*,**  
597 **FOXO target genes and *foxo*.**

598 (A-C) Whole larvae mRNA levels measured by qRT-PCR in control (*hml* > +) versus TFAM RNAi (*hml* >  
599 *UAS-TFAM-RNAi*) larvae at 96 hrs AEL. Data are represented as mean  $\pm$  SEM, with individual data  
600 points plotted as symbols (\*p < 0.05 and ns, not significant, unpaired t-test). n (# of samples) = 6  
601 (control) and 6 (TFAM RNAi).

602

603 **Figure S3: Hemocyte specific knock down if JNK pathway components suppresses systemic growth**  
604 **(related to Fig. 5 and 6)**

605 (A) Time to pupation was measured in control (*hml* > +), TFAM RNAi (*hml* > *UAS-TFAM RNAi*), Kay RNAi  
606 (*hml* > *UAS-Kay RNAi*) and TFAM RNAi + Kay RNAi (*hml* > *UAS-TFAM RNAi* + *UAS-Kay RNAi*) larvae. Data  
607 are represented as mean  $\pm$  SEM, with individual data points plotted as symbols (\*p < 0.05 and ns, not  
608 significant, unpaired t-test). n (# of samples) = 278 (control), 460 (*TFAM RNAi*), 128 (*Kay RNAi*), and 126  
609 (*TFAM RNAi* + *Kay RNAi*).

610 (B) Relative change in pupal volume was calculated based on the average value of control (+/+)  
611 animals. Data are presented as mean  $\pm$  SEM (\*p < 0.05, Mann-Whitney U test) for controls and Eiger  
612 RNAi lines (+/*UAS-Eiger-RNAi*). n (# of pupae) = 76 (control) vs 148 (Eiger RNAi).

613

614

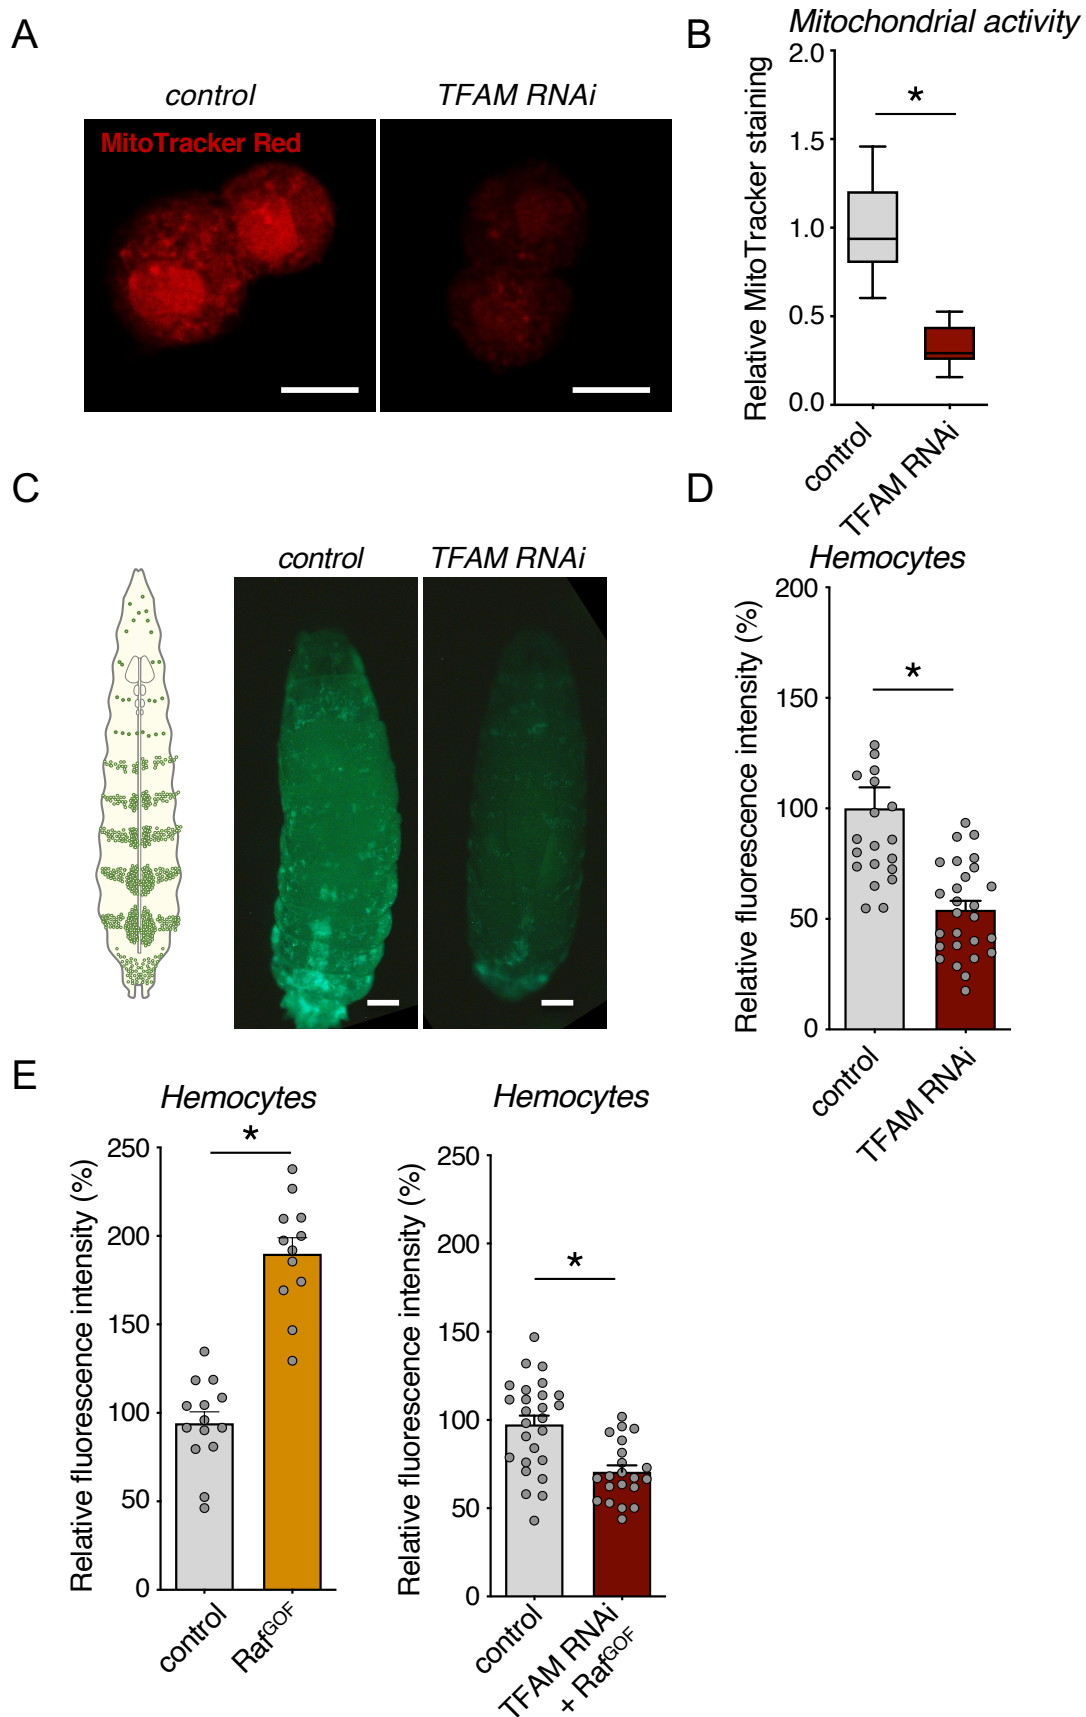

Figure 1



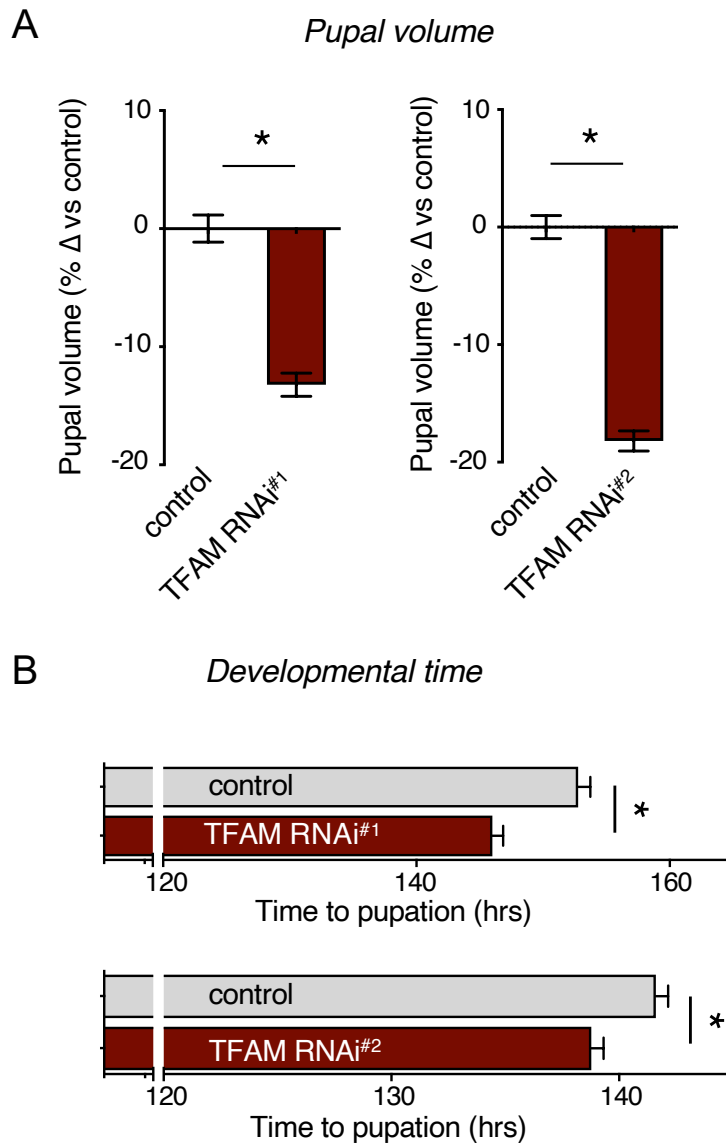

Figure 2

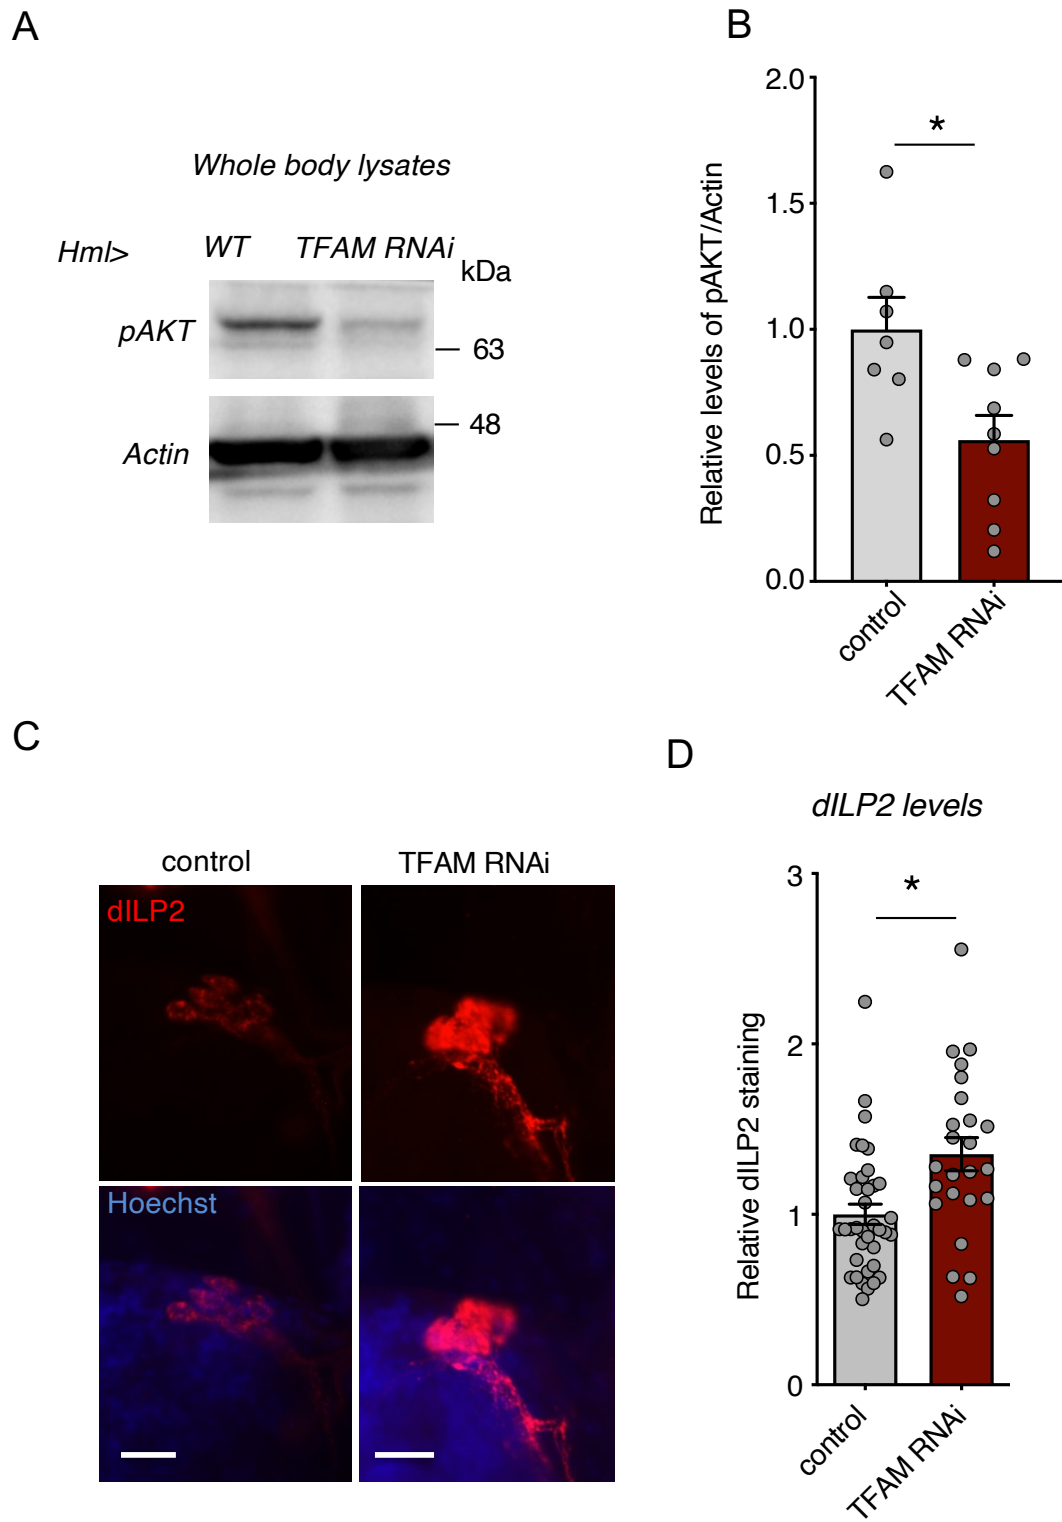

Figure 3

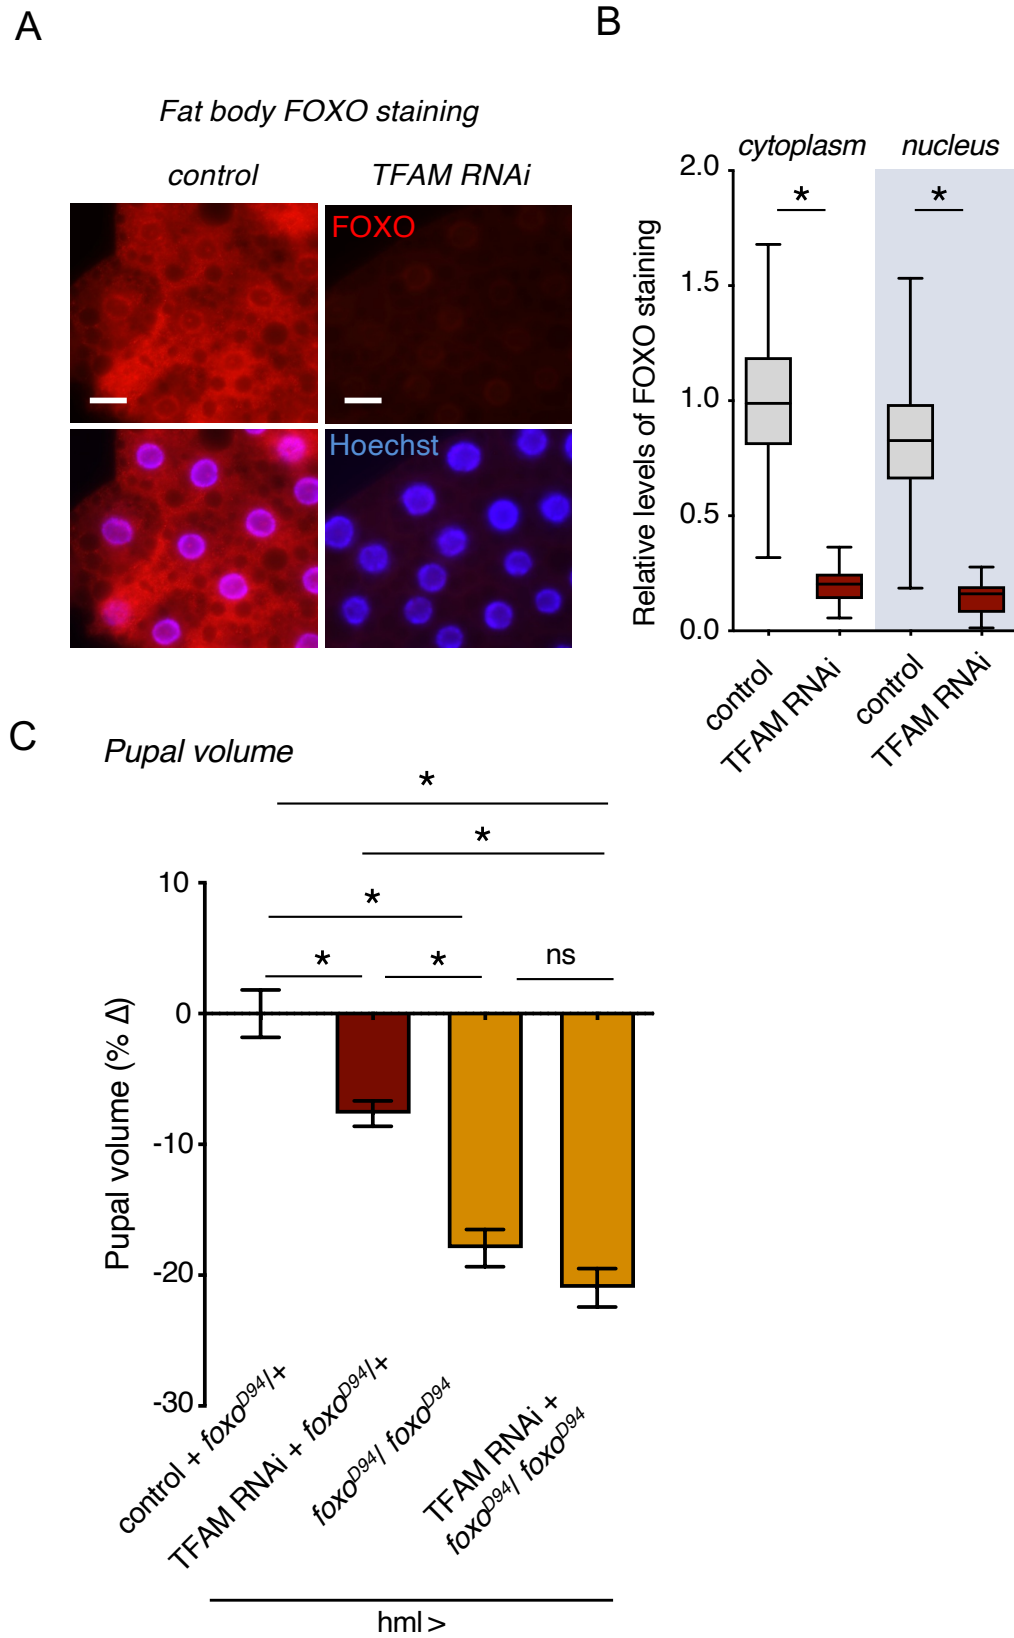

Figure 4

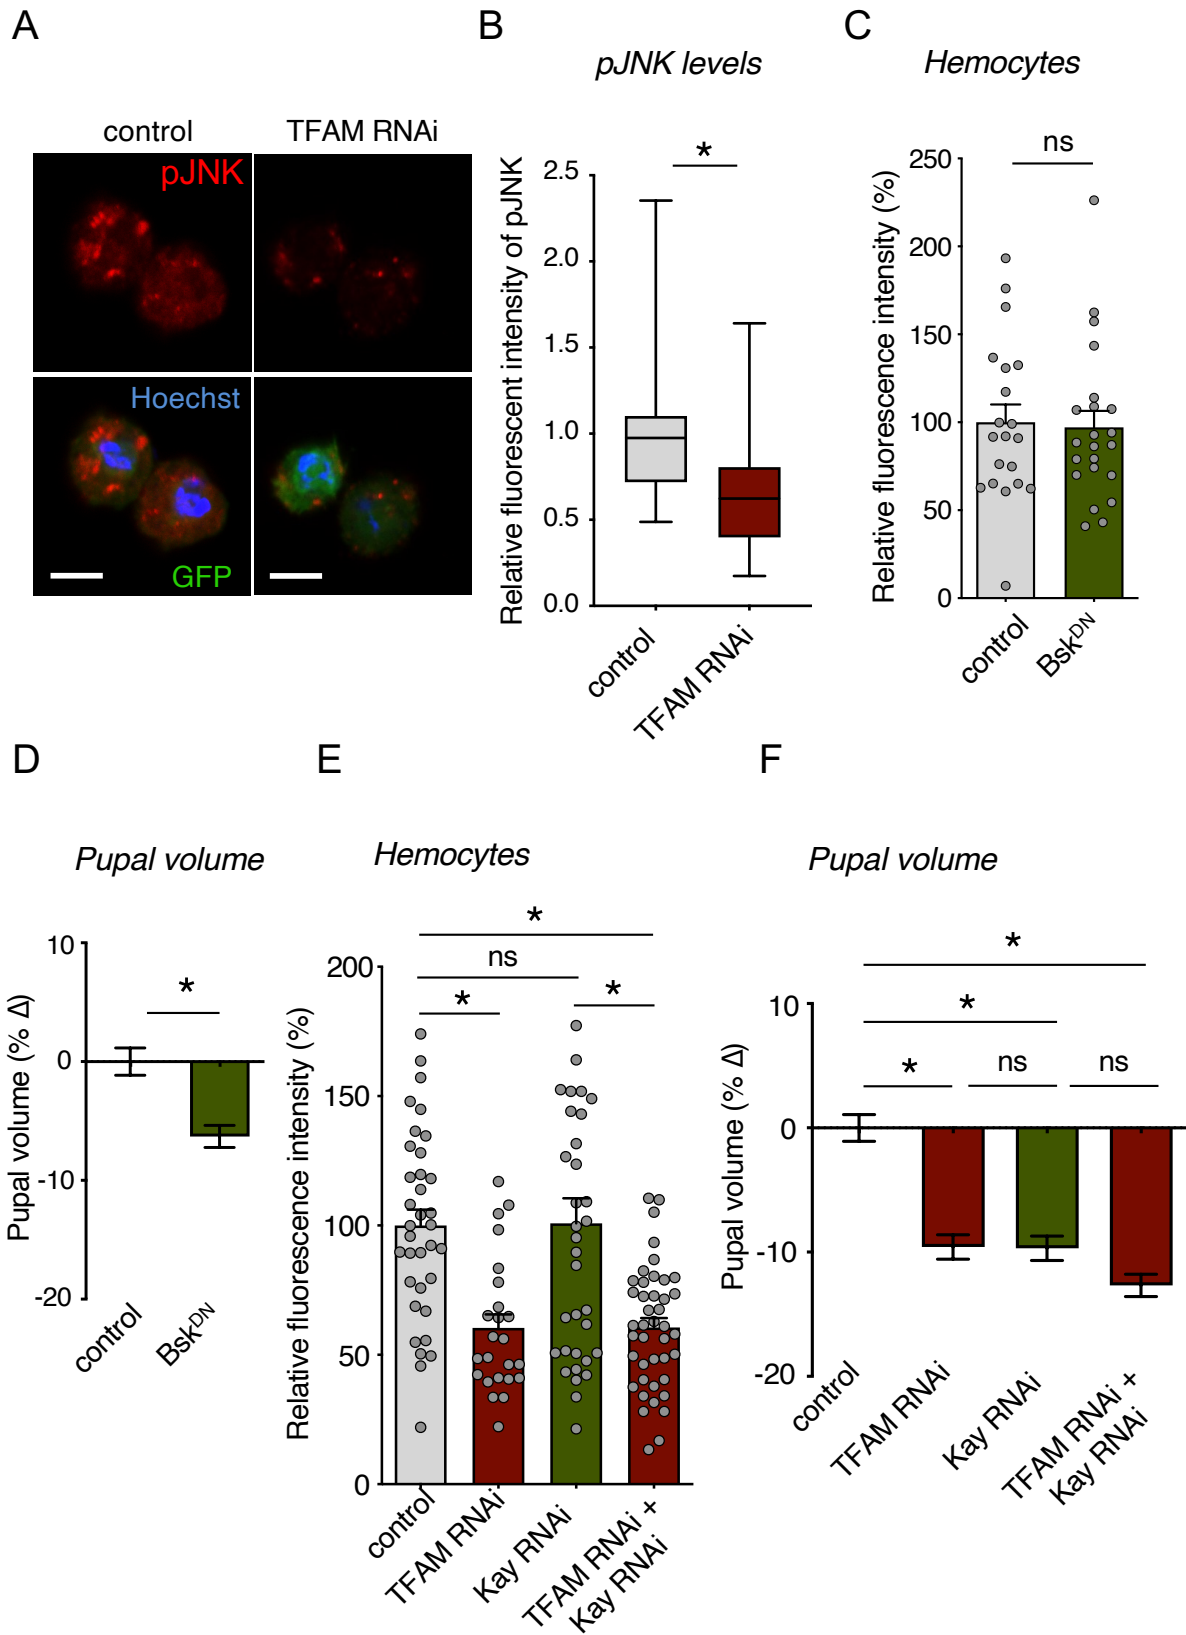

Figure 5

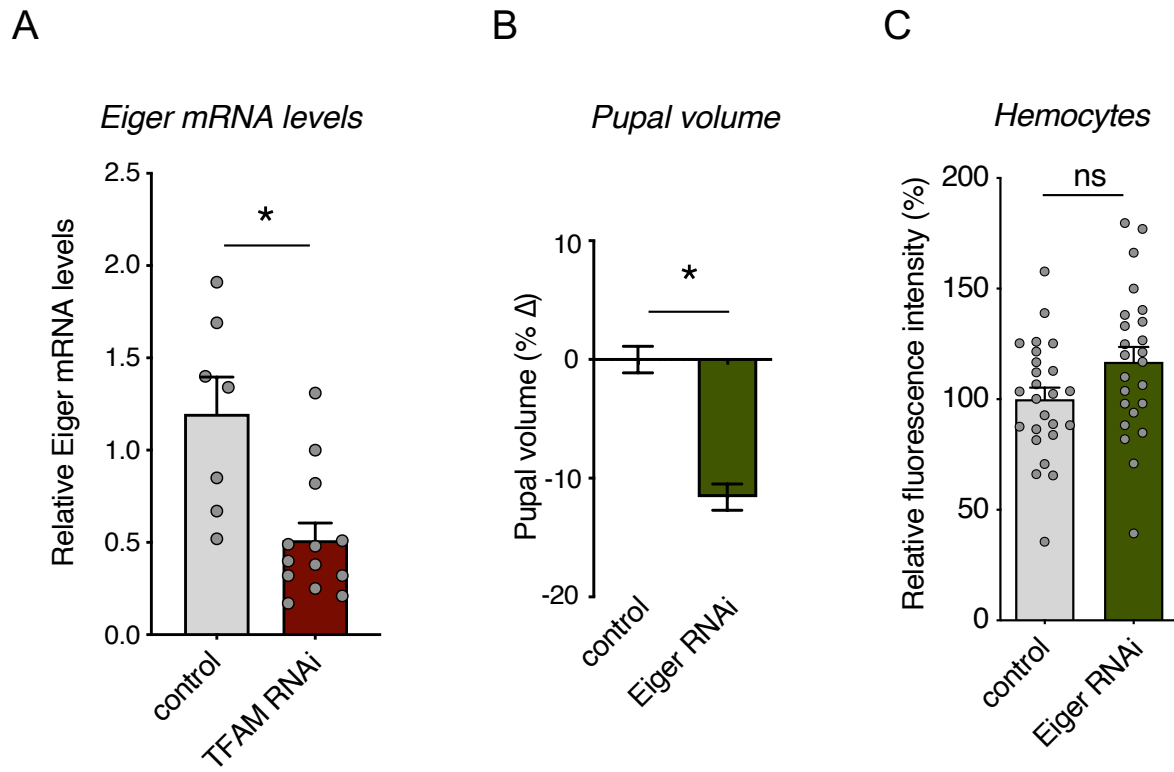

Figure 6

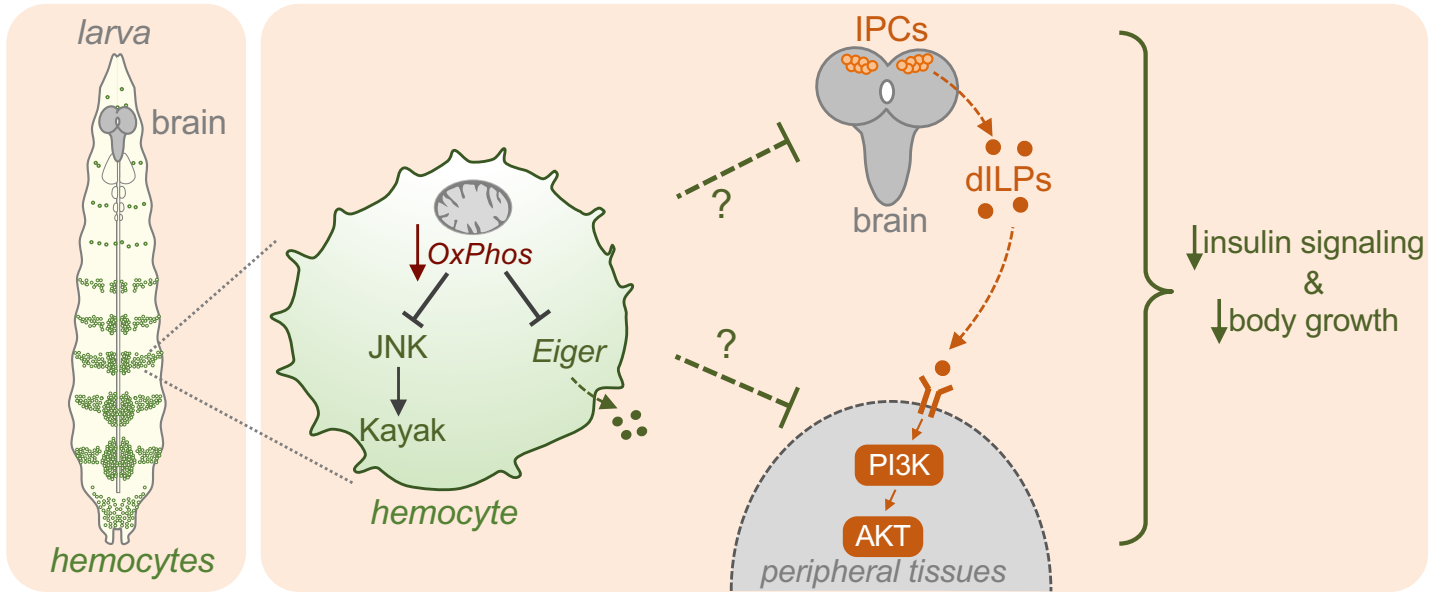

Figure 7

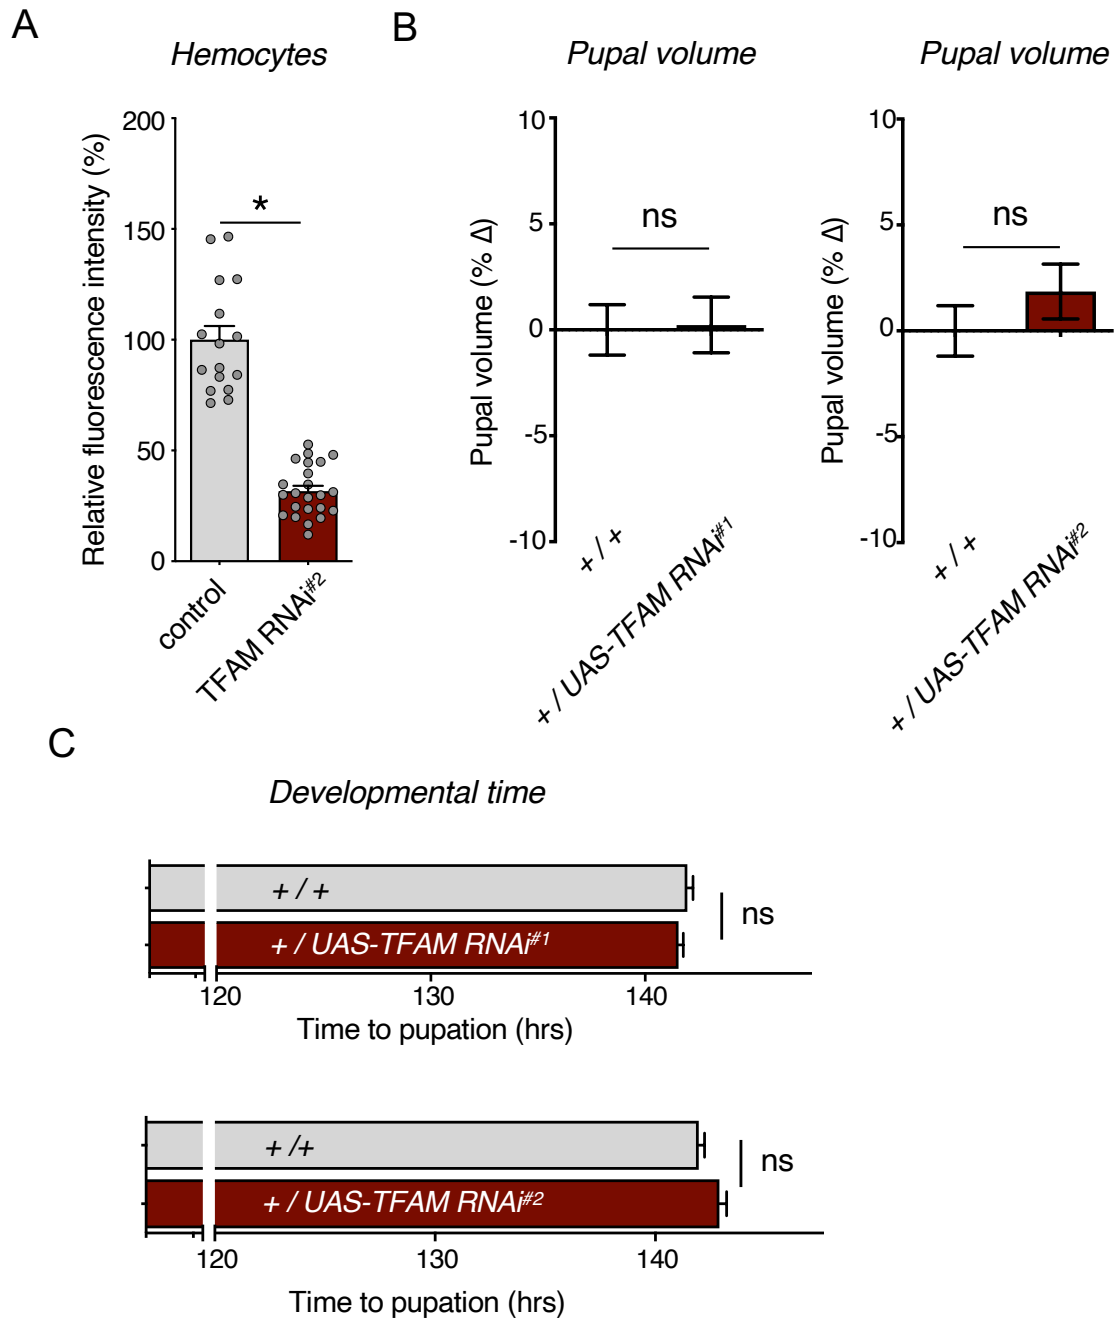

Figure S1: TFAM knock down in hemocytes suppresses hemocyte proliferation and systemic growth (related to Fig. 1 and 2)



Figure S1: TFAM knock down in hemocytes suppresses hemocyte proliferation and systemic growth (related to Fig. 1 and 2)

**(A)** Quantification of GFP fluorescent intensity from control (*hml>+*) versus TFAM RNAi<sup>#1</sup> (*hml>UAS-TFAM-RNAi*) larvae at wandering stage. Data are represented as mean  $\pm$  SEM, with individual data points plotted as symbols (\**p* < 0.05, unpaired t-test). *n* (# of samples) = 16 (control) and 23 (TFAM-RNAi<sup>#1</sup>).

**(B)** Relative change in pupal volume was calculated based on the average value of control (+/+) animals. Data are presented as mean  $\pm$  SEM (\**p* < 0.05, Mann-Whitney U test) for controls and two different TFAM RNAi lines (+/*UAS-TFAM-RNAi*). *n* (# of pupae) = 147 (control) vs 148 (TFAM RNAi<sup>#1</sup>) and 147 (control) vs 146 (TFAM RNAi<sup>#2</sup>).

**(C)** Time to pupation was measured in control (+/+) larvae versus larvae expressing one of two different TFAM RNAi transgenes (+/*UAS-TFAM RNAi*). Data are presented as mean time to pupation  $\pm$  SEM (\**p* < 0.05, Mann-Whitney U test). *n* (# of pupae) = 590 (control) vs 675 (TFAM RNAi<sup>#1</sup>) and 590 (control) vs 592 (TFAM RNAi<sup>#2</sup>).

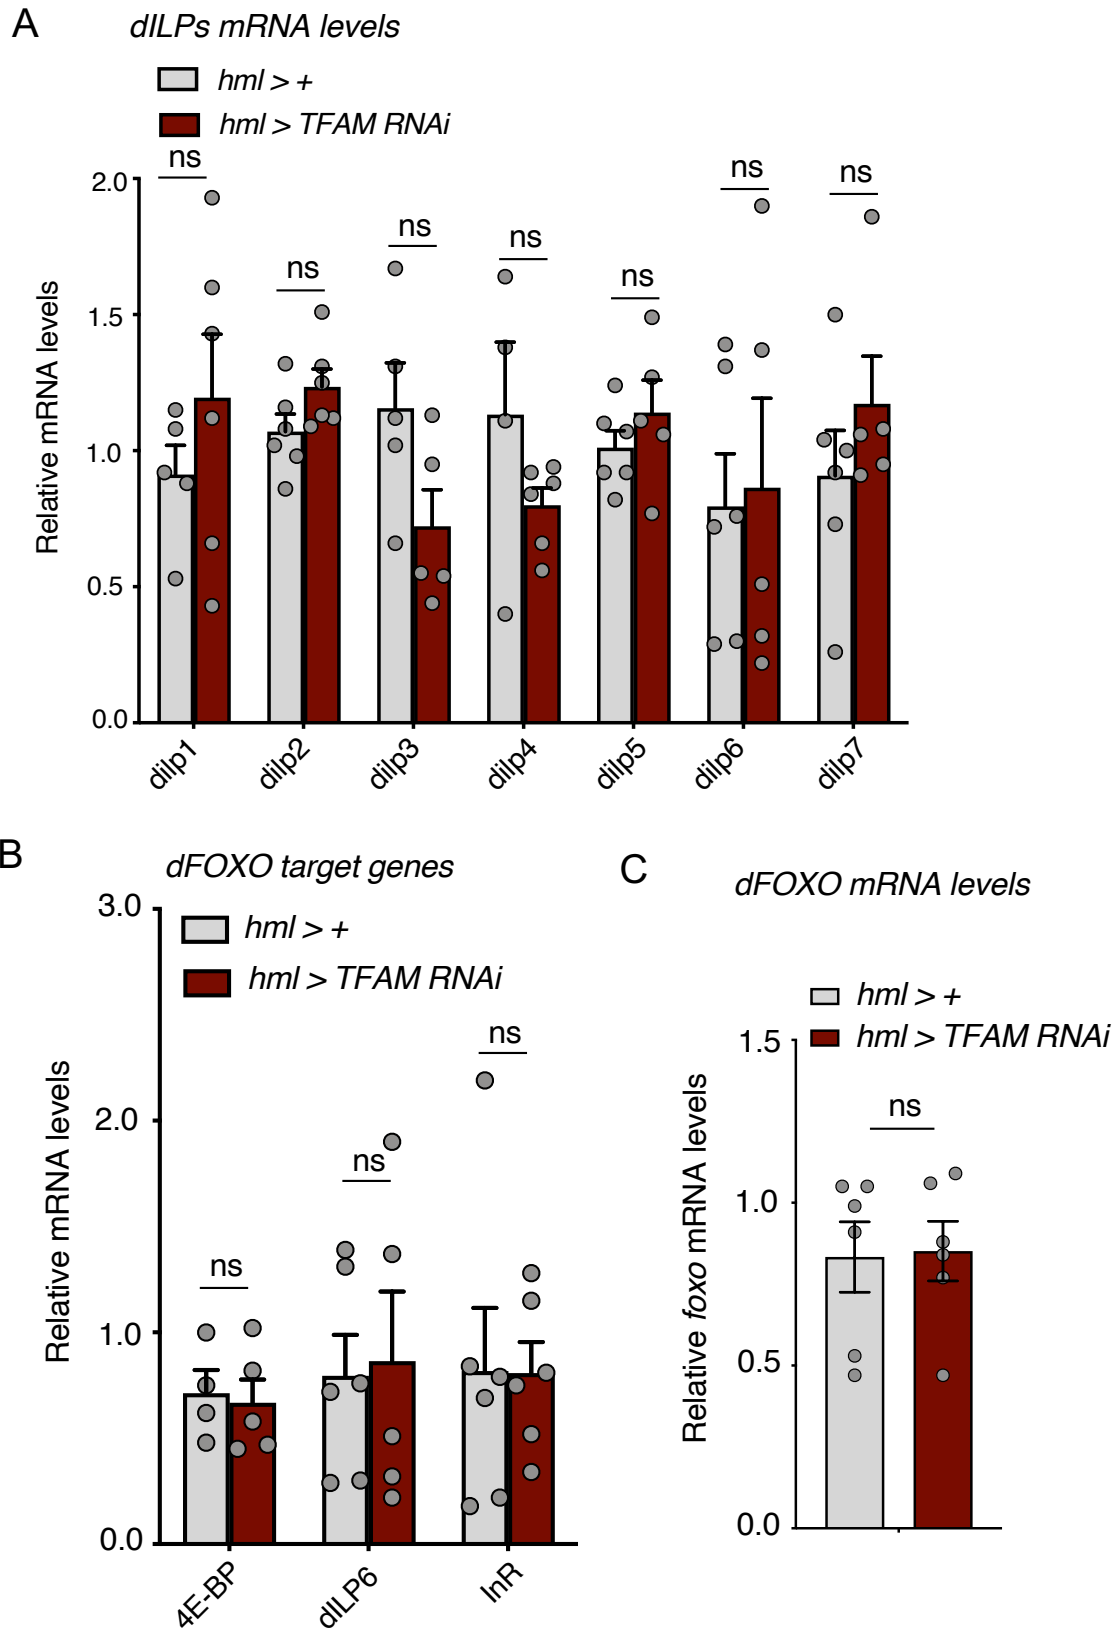

Figure S2: Hemocyte TFAM knock down shows no change in whole larvae mRNA levels of dILPs, dFOXO target genes and dFOXO.

Figure S2: Hemocyte TFAM knock down shows no change in whole larvae mRNA levels of *dILPs*, FOXO target genes and *foxo*.

**(A-C)** Whole larvae mRNA levels measured by qRT-PCR in control (*hml* > +) versus TFAM RNAi (*hml* > *UAS-TFAM-RNAi*) larvae at 96 hrs AEL. Data are represented as mean  $\pm$  SEM, with individual data points plotted as symbols (\* $p$  < 0.05 and ns, not significant, unpaired t-test). n (# of samples) = 6 (control) and 6 (TFAM RNAi).

A

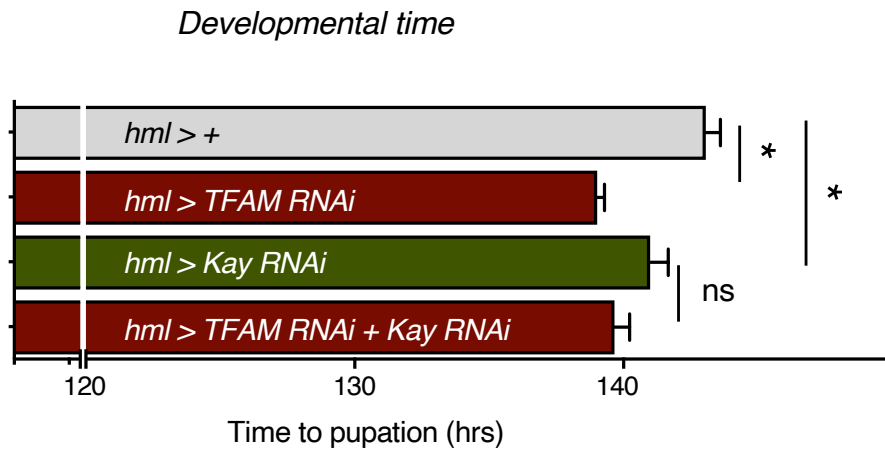

B

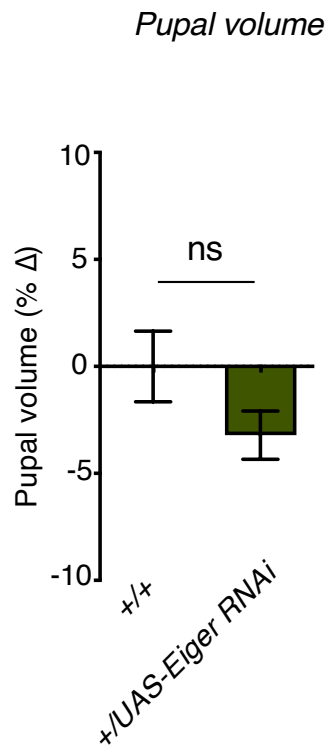

Figure S3: Hemocyte specific knock down of JNK signaling suppresses systemic growth (related to Fig. 5 and 6)

Figure S3: Hemocyte specific knock down of JNK pathway components suppresses systemic growth (related to Fig. 5 and 6)

**(A)** Time to pupation was measured in control (*hml* > +), TFAM RNAi (*hml* > *UAS-TFAM RNAi*), Kay RNAi (*hml* > *UAS-Kay RNAi*) and TFAM RNAi + Kay RNAi (*hml* > *UAS-TFAM RNAi* + *UAS-Kay RNAi*) larvae. Data are represented as mean  $\pm$  SEM, with individual data points plotted as symbols (\* $p$  < 0.05 and ns, not significant, unpaired t-test). n (# of samples) = 278 (control), 460 (*TFAM RNAi*), 128 (*Kay RNAi*), and 126 (*TFAM RNAi* + *Kay RNAi*).

**(B)** Relative change in pupal volume was calculated based on the average value of control (+/+) animals. Data are presented as mean  $\pm$  SEM (\* $p$  < 0.05, Mann-Whitney U test) for controls and Eiger RNAi lines (+/*UAS-Eiger-RNAi*). n (# of pupae) = 76 (control) vs 148 (Eiger RNAi).
